# Supplementary material for: Acceptability of a ‘guidebook’ for the management of Osteoarthritis: a qualitative study of patient and clinician’s perspectives
Source: PubMed Central journal article supplement (PMC4301067; doi:10.1186/1471-2474-15-427), 2014-12-13
Supplement: 12891_2014_2376_MOESM1_ESM.pdf [file 12891_2014_2376_MOESM1_ESM.pdf]

Older person aged 45 years and over with peripheral joint pain (of the knee, hip, hand or foot)

Goes to see the GP for help with the problem

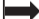

### **GP consultation**

Problem assessed  
Diagnosis made

Patient's ideas, concerns and expectations elicited  
If osteoarthritis:

Diagnosis given & explained

OA guidebook given

Analgesia advice or prescription given

Appt. in the OA clinic offered

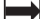

### **OA clinic**

Up to four 20min appointments with a practice nurse to **support** the self-management of OA:

- Providing education and advice
- Helping the patient to make changes
- Focussing on exercise, weight loss and pain control
